# Supplementary material
Source: MDPI journal article supplement (https://www.mdpi.com/2813-2564/2/3/12)
Supplement: s1 [file s1]

Archive with 1 entries (1 files):
- receptors-2411724-supplementary.pdf
